# Supplementary material for: Selective oxidative protection leads to tissue topological changes orchestrated by macrophage during ulcerative colitis
Source: Research Square preprint supplement (doi:10.21203/rs.3.rs-763356/v1), 2021-08-13
Supplement: Supplementary file 1 [file 05fb87d1d52181b89aae0242.pdf]

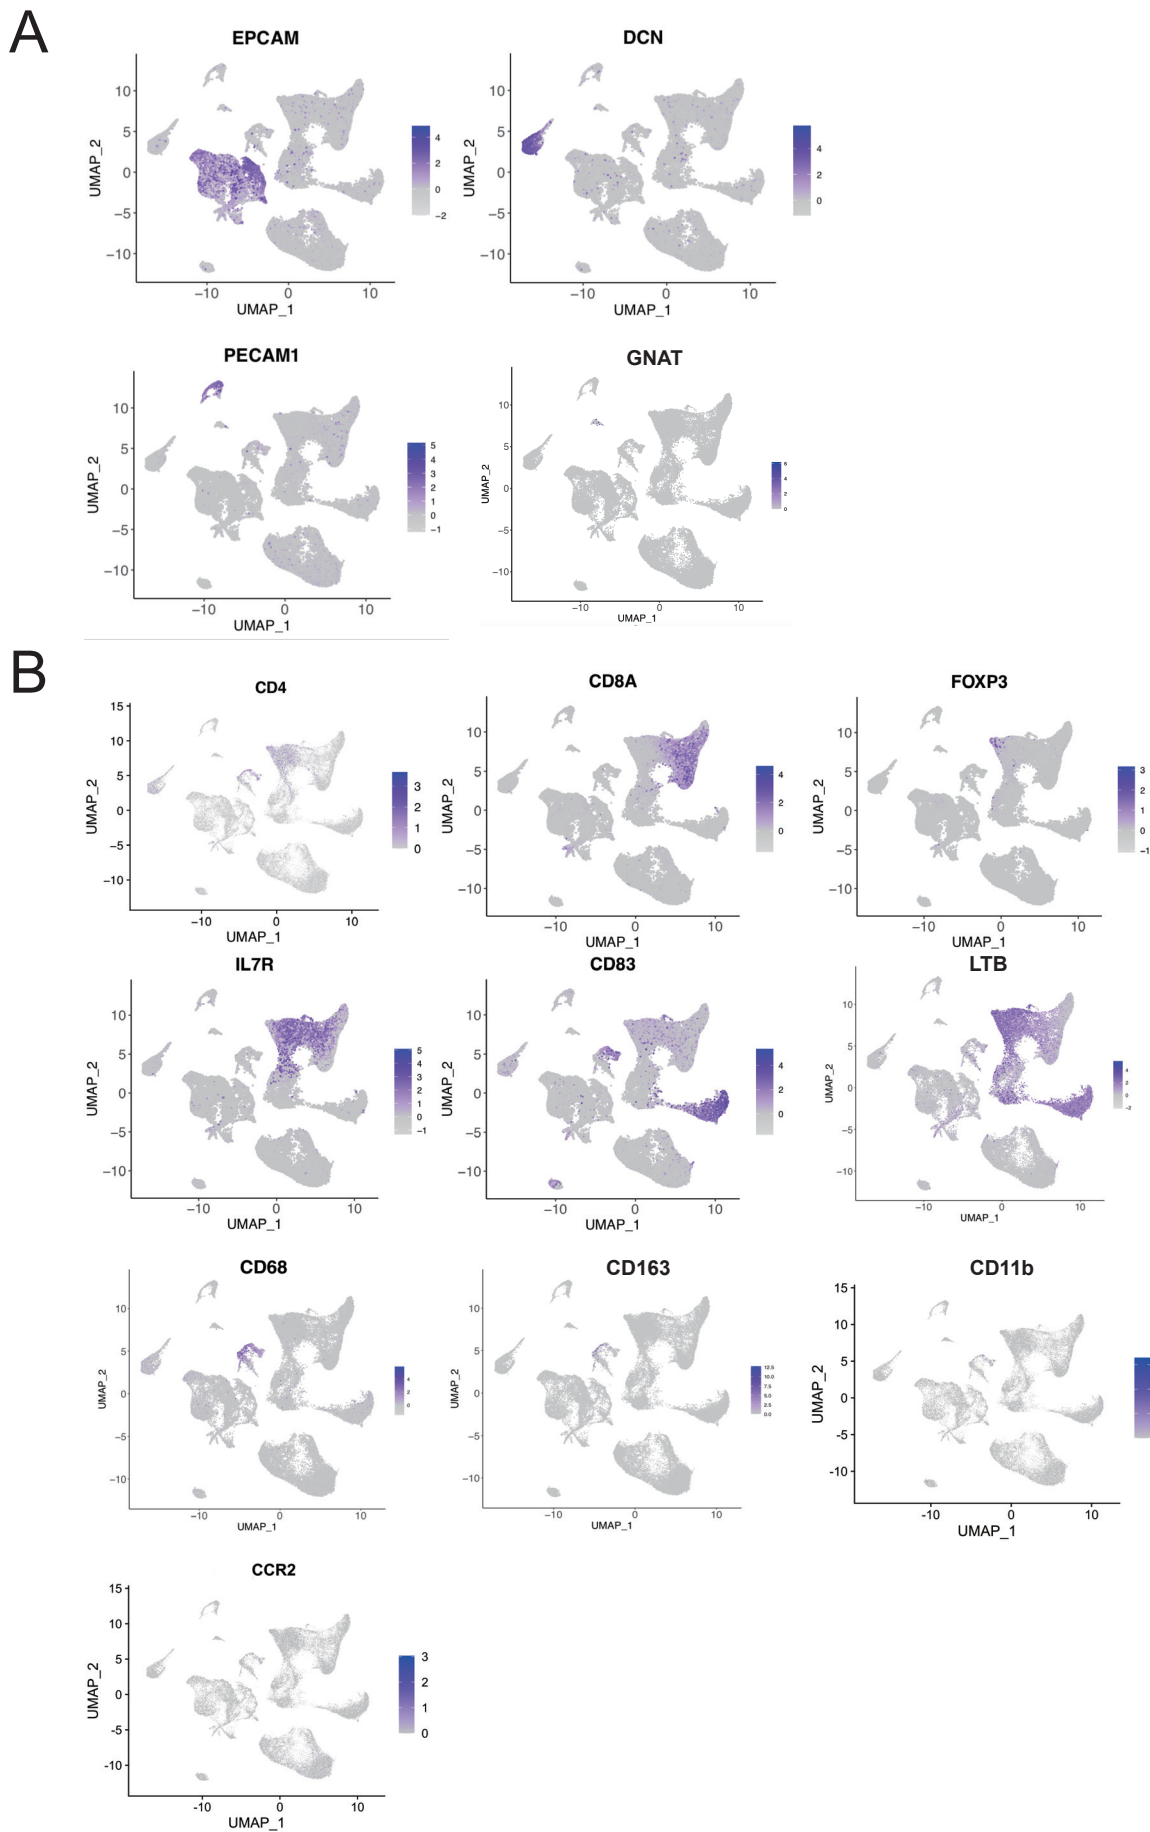

**Figure S2. t-SNE plots of representative cell clusters.**

**A**, t-SNE plots of epithelial and stromal cells. EPCAM, DCN, PECAM and GNAT were used to highlight the epithelial cells, smooth muscle cells, endothelial cells and Tuft cells, respectively. **B**, t-SNE plots of various immune cells. CD4, CD8, FOXP3 and IL7R were used to highlight the CD4<sup>+</sup> T cell, CD8<sup>+</sup> T cell, FOXP3<sup>+</sup> regulatory T cell and memory T cells. CD83 and Lymphotoxin beta (LTB) were used to highlight the CD83<sup>+</sup> activated B cell and LTB<sup>+</sup> B cell. CD68, CD163, CD11b and CCR2 were used to define CD68<sup>+</sup>CD163<sup>+</sup>CD11b<sup>low</sup> resident macrophage and CD68<sup>+</sup>CD163<sup>low</sup>CD11b<sup>+</sup>CCR2<sup>+</sup> inflammatory macrophage.
