# Supplementary material for: Selective oxidative protection leads to tissue topological changes orchestrated by macrophage during ulcerative colitis
Source: Research Square preprint supplement (doi:10.21203/rs.3.rs-763356/v1), 2021-08-13
Supplement: Supplementary file 2 [file 2c9f6e2c4f9c7084d2fe1f7d.xlsx]

## Sheet: Imaging Mass Cytometry Antibody
Imaging Mass Cytometry Antibody Panel
Antibodies	Metal	Clone	Source (antibody)	Cat# (antibody)	Source (metal)	Cat# (metal)
CD45	89 Y	D9M8I	CST	13917S	Macklin	Y820645
IL6	115 In	1A3B4	Proteintech	66146-1-Ig	Macklin	I822392
CD14	141 Pr	EPR3653	Abcam	ab226121	Fluidigm	201141A
FoxP3	142 Pr	D6O8R	CST	12653S	Fluidigm	201142A
CD16	143 Nd	EPR16784	Abcam	ab256582	Fluidigm	201143A
CD69	144 Nd	EPR21814	Abcam	ab234512	Fluidigm	201144A
CD4	145Nd	EPR6855	Abcam	ab181724	Fluidigm	201145A
CD8a	146 Nd	C8/144B	Biolegend	372902	Fluidigm	201146A
Collagen I	147 Sm	EPR7785	Abcam	ab215969	Fluidigm	201147A
Cleaved Caspase-3	148 Nd	5A1E	CST	9664S	Fluidigm	201148A
CD31	149 Sm	89C2	CST	3528S	Fluidigm	201149A
E-cadherin	150 Nd	DECMA-1	Biolegend	147302	Fluidigm	201150A
B7-H4	151 Eu	H74	Thermofisher	14-5949-82	Fluidigm	201151A
VISTA	152 Sm	D1L2G	CST	64953S	Fluidigm	201152A
CD7	153 Eu	EPR4242	Abcam	ab230834	Fluidigm	201153A
CD163	154 Sm	EDHu-1	Novus	NB110-40686	Fluidigm	201154A
CD103	155 Gd	EPR4166(2)	Abcam	ab271889	Fluidigm	201155A
PD-L1	156 Gd	E1L3N	CST	13684S	Fluidigm	201156A
LAG3	158 Gd	D2G4O	CST	15372S	Fluidigm	201158A
CD68	159 Tb	C8/144B	Biolegend	372902	Fluidigm	201159A
CD11b	160 Gd	EPR1344	Abcam	ab209970	Fluidigm	201160A
CD20	161 Dy	IGEL/773	Abcam	ab213033	Fluidigm	201161A
CD11c	162 Dy	EP1347Y	Abcam	ab216655	Fluidigm	201162A
CD15	163 Dy	HI98	BD	563872	Fluidigm	201163A
Granzyme B	164 Dy	EPR20129-217	Abcam	ab219803	Fluidigm	201164A
PD-1	165 Ho	D4W2J	CST	86163S	Fluidigm	201165A
Ki67	166 Er	B56	BD	550609	Fluidigm	201166A
GATA-3	167 Er	D13C9	CST	5852S	Fluidigm	201167A
HLA-DR	168 Er	EDHu-1	Novus	NB110-40686	Fluidigm	201168A
CD45RA	169 Tm	HI100	Biolegend	304143	Fluidigm	201169A
CD3ε	170 Er	D7A6E	CST	85061S	Fluidigm	201170A
TNFα	171 Yb	7B8A11	Proteintech	60291-1-Ig	Fluidigm	201171A
IL-1β	172 Yb	2A1B4	Proteintech	66737-1-Ig	Fluidigm	201172A
CD45RO	173 Yb	UCHL1	Biolegend	304239	Fluidigm	201173A
CD57	174 Yb	NK-1	BD	555618	Fluidigm	201174A
IL-2 Receptor alpha (CD25)	175 Lu	EPR6452	Abcam	ab215378	Fluidigm	201175A
Pan-Cytokeratin	176 Yb	AE-1/AE-3	Biolegend	914204	Fluidigm	201176A
Alpha Smooth Muscle Actin	194 Pt	1A4	Biolegend	904601	Fluidigm	201194
Vimentin	198 Pt	D21H3	CST	5741S	Fluidigm	201198
Table S1

## Sheet: CyTOF Antibody Panel
CyTOF Antibody Panel
Antibodies	Metal	Clone	Source (antibody)	Cat# (antibody)	Source (metal)	Cat# (metal)
CD45	89 Y	30-F11	Biolegend	103141	Macklin	Y820645
CD103	141 Pr	2E7	Biolegend	121402	Fluidigm	201141A
CD31	144 Nd	390	Biolegend	102425	Fluidigm	201144A
CD19	145Nd	6D5	Biolegend	115547	Fluidigm	201145A
CD8a	146 Nd	53-6.7	Biolegend	100755	Fluidigm	201146A
Ly6G	147 Sm	1A8	Biolegend	127637	Fluidigm	201147A
CD49b	148 Nd	HMα2	Biolegend	103513	Fluidigm	201148A
Ly6C	149 Sm	HK1.4	Biolegend	128039	Fluidigm	201149A
IgD	150 Nd	11-26c.2a	Biolegend	405737	Fluidigm	201150A
CD62L	151 Eu	MEL-14	Biolegend	104443	Fluidigm	201151A
CD11b	153 Eu	M1/70	Biolegend	101249	Fluidigm	201153A
CD3ε	154 Sm	145-2C11	Biolegend	100345	Fluidigm	201154A
CD86	155 Gd	GL-1	Biolegend	105002	Fluidigm	201155A
CD138	156 Gd	281-2	Biolegend	142502	Fluidigm	201156A
XCR1	158 Gd	ZET	Biolegend	148202	Fluidigm	201158A
F4/80	159 Tb	BM8	Biolegend	123143	Fluidigm	201159A
PD-L1	162 Dy	10F.9G2	Biolegend	124302	Fluidigm	201162A
CD11c	163 Dy	N418	Biolegend	117341	Fluidigm	201163A
CD64	165 Ho	X54-5/7.1	Biolegend	139302	Fluidigm	201165A
MERTK	167 Er	2B10C42	Biolegend	151502	Fluidigm	201167A
CD44	168 Er	IM7	Biolegend	103051	Fluidigm	201168A
CD38	170 Er	90	Biolegend	102723	Fluidigm	201170A
MHC II	171 Yb	M5/114.15.2	Biolegend	107637	Fluidigm	201171A
CD27	172 Yb	LG.3A10	Biolegend	124202	Fluidigm	201172A
CD172a	173 Yb	P84	Biolegend	144002	Fluidigm	201173A
CD24	174 Yb	M1/69	Biolegend	101829	Fluidigm	201174A
Ki-67	176 Yb	11F6	Biolegend	151202	Fluidigm	201176A
CD4	198 Pt	RM4-5	Biolegend	100561	Fluidigm	201198
Table S1

## Sheet: FACS Antibody Panel
FACS Antibody Panel
Species	Antibodies	Clone	Source	Cat#
human	CD45	HI30	BD	563716
human	CD11b	1CRF44	BD	562721
human	CD4	RPA-T4	BD	557871
human	CD8	RPA-T8	BD	557746
human	CD19	SJ25C1	BD	563549
human	CD3	SK7	Biolegend	981002
human	CD68	Y1/82A	Biolegend	333808
human	HLA-DR	L243	Biolegend	307626
human	EpCAM	9C4	Biolegend	324208
human	CCR2	K036C2	Biolegend	357204
mouse	CD45	30-F11	BD	563053
mouse	CD11b	M1/70	BD	562287
mouse	MHCII (I-A/I-E)	M5/114.15.2	BD	562564
mouse	CD4	GK1.5	BD	552051
mouse	F4/80	BM8	Biolegend	123114
mouse	CD3ε	17A2	Biolegend	100203
mouse	Ly6C	HK1.4	Biolegend	128036
mouse	Ly6G	1A8	Biolegend	127605
mouse	CD8a	53-6.7	Biolegend	100722
mouse	TNFα	MP6-XT22	Thermofisher	12-7321-82
Table S1
