# Supplementary material for: Selective oxidative protection leads to tissue topological changes orchestrated by macrophage during ulcerative colitis
Source: Research Square preprint supplement (doi:10.21203/rs.3.rs-763356/v1), 2021-08-13
Supplement: Supplementary file 2 [file 685af32aee61457b6727d739.pdf]

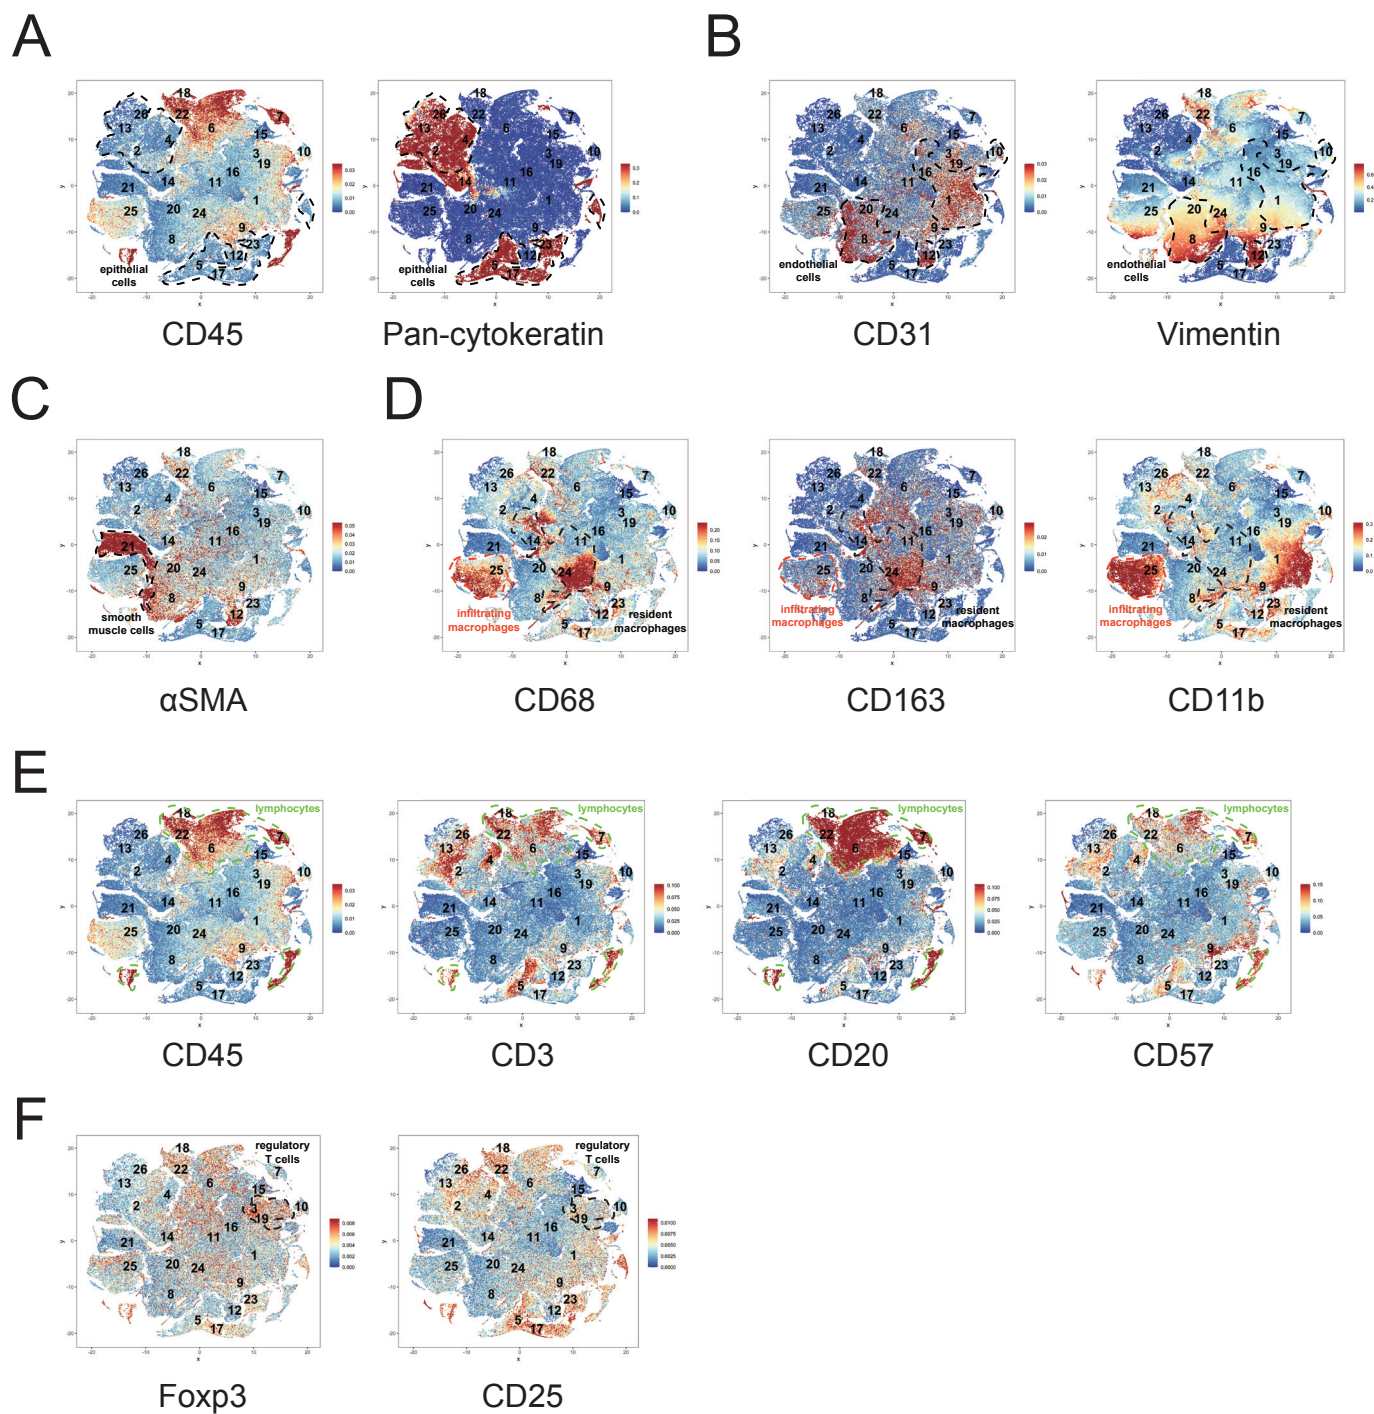

**Figure S1. t-SNE plots of various cell clusters.**

**A**, t-SNE plots of epithelia cells highlighted with black dotted lines. **B**, t-SNE plots of endothelial cells highlighted with black dotted lines. **C**, t-SNE plots of smooth muscle cells highlighted with black dotted lines. **D**, t-SNE plots of resident macrophages highlighted with black dotted lines and infiltrating macrophages highlighted with red dotted lines. **E**, t-SNE plots of lymphocytes highlighted with green dotted lines. **F**, t-SNE plots of regulatory T cells highlighted with black dotted lines.
