# Supplementary material for: Selective oxidative protection leads to tissue topological changes orchestrated by macrophage during ulcerative colitis
Source: Research Square preprint supplement (doi:10.21203/rs.3.rs-763356/v1), 2021-08-13
Supplement: Supplementary file 3 [file 2459c21e33c1be076bedc81f.xlsx]

## Sheet: Sheet1
Patient ID	Gender	Age	Diagnosis	Mayo Clinic Endoscopic Subscore	The Montreal classification
					Extent (E1E2E3)	Severity
1	F	27	UC	1	1	mild
2	F	38	UC	2	2	moderate
3	M	43	UC	1	2	moderate
4	F	30	UC	1	2	mild
5	M	35	UC	2	3	moderate
6	M	57	UC	2	3	severe
7	M	53	UC	2	2	severe
8	M	45	UC	0	1	clinical remission
9	M	62	UC	3	2	mild
10	M	63	UC	1	2	moderate
11	F	66	UC	2	2	mild
12	F	37	UC	2	2	moderate
13	M	63	UC	3	2	severe
14	M	45	UC	3	3	moderate
15	M	45	UC	2	1	moderate
16	F	37	UC	3	2	severe
17	F	49	UC	3	1	mild
18	M	55	UC	2	3	clinical remission
20	F	65	UC	3	2	severe
21	M	38	UC	1	3	mild
22	M	48	UC	1	2	clinical remission
23	M	51	UC	2	1	moderate
24	F	70	UC	3	2	severe
25	M	66	UC	3	3	severe
26	M	70	UC	3	2	moderate
27	F	39	UC	3	2	severe
28	F	47	UC	1	1	severe
29	F	30	UC	2	2	mild
30	M	39	UC	2	1	moderate
31	M	27	UC	1	3	clinical remission
32	F	67	UC	2	2	mild
33	F	46	UC	3	3	severe
34	M	54	UC	2	2	mild
35	M	24	UC	3	3	severe
37	F	54	UC	2	1	moderate
38	F	32	UC	3	2	severe
40	F	71	UC	3	1	moderate
41	F	50	UC	2	2	moderate
42	M	38	UC	2	2	mild
43	F	40	UC	3	3	severe
45	F	60	normal	0
46	M	27	normal	0
47	F	31	normal	0
48	F	52	normal	0
49	M	45	normal	0
50	M	38	normal	0
51	M	67	normal	0
53	M	54	normal	0
54	M	49	normal	0
Table S2
